# Supplementary material
Source: PubMed Central journal article supplement (PMC7706208)

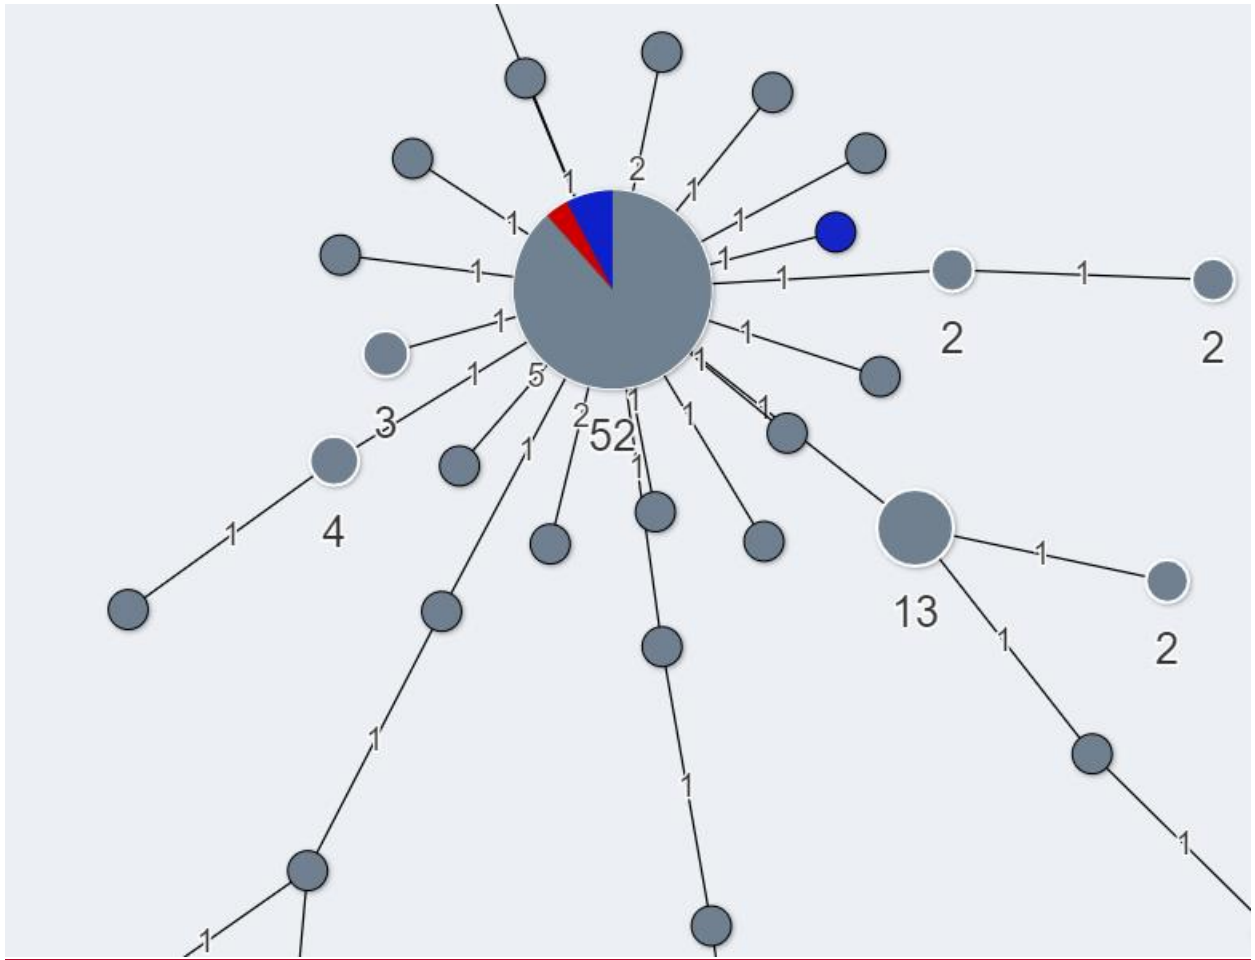

Supplement: 13756_2020_853_MOESM1_ESM.pdf [file 13756_2020_853_MOESM1_ESM.pdf]
